# Supplementary material for: β-Cyclodextrin–Hyaluronic Acid Polymer Functionalized Magnetic Graphene Oxide Nanocomposites for Targeted Photo-Chemotherapy of Tumor Cells
Source: PubMed Central journal article supplement (PMC6401939; doi:10.3390/polym11010133), 2019-01-14
Supplement: polymers-11-00133-s001.pdf [file polymers-11-00133-s001.pdf]

## Supplementary Material

# $\beta$ -Cyclodextrin-Hyaluronic Acid Polymer Functionalized Magnetic Graphene Oxide Nanocomposites for Targeted Photo-Chemotherapy of Tumor Cells

Wenting Liang <sup>1,\*</sup>, Yu Huang <sup>1</sup>, Dongtao Lu <sup>1</sup>, Xuewen Ma <sup>1</sup>, Tao Gong <sup>2</sup>, Xiaodong Cui <sup>1</sup>,  
Baofeng Yu <sup>2,\*</sup>, Cheng Yang <sup>3,\*</sup>, Chuan Dong <sup>1</sup> and Shaomin Shuang <sup>1,\*</sup>

Fig.S1. <sup>1</sup>H NMR and <sup>13</sup>C NMR spectra of mono-6-deoxyl-6-ethylenediamino- $\beta$ -CD.

Fig.S2. <sup>1</sup>H NMR spectra of CD-HA.

Fig.S3. Hydrodynamic diameter distributions of MGO and CDHA-MGO.

Fig.S4. N<sub>2</sub> adsorption-desorption isotherm curve of MGO and CDHA-MGO.

Fig.S5. Plot of calibration curves for DOX solution with different concentration.

Fig.S6. Influence of pH on the adsorption of DOX onto CDHA-MGO.

Fig.S7. Linear fitting plots of Lagergren's pseudo-first-order and Ho's pseudo-second-order equations.

Fig.S8. Langmuir plot and Freundlich plot for adsorption of DOX.

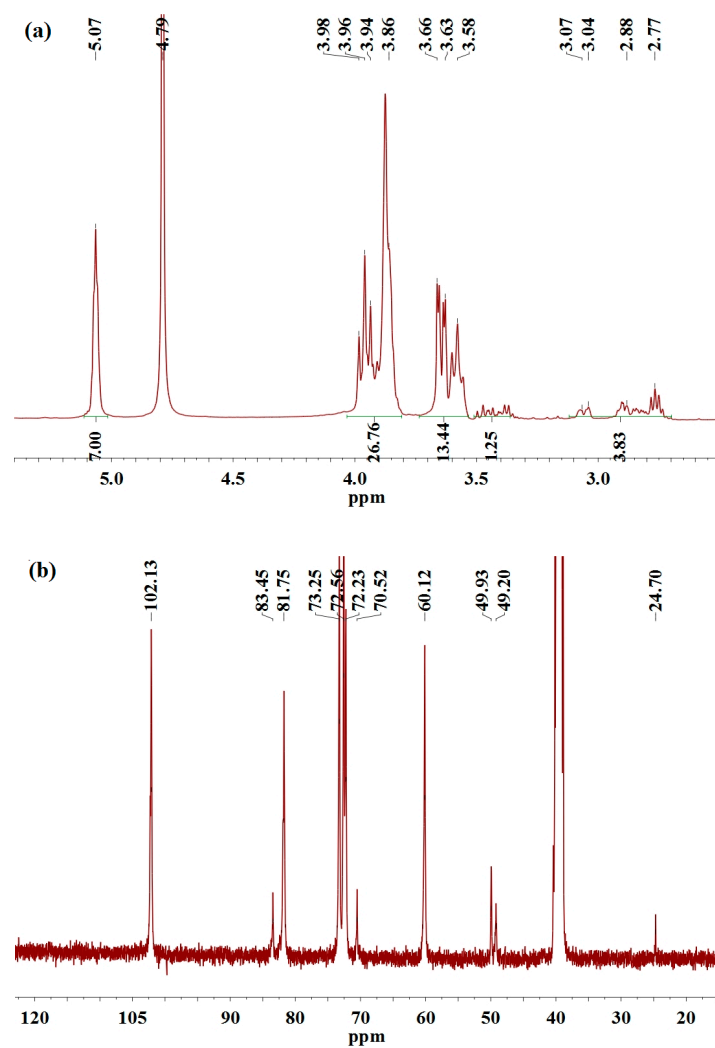

**Fig. S1.** (a) <sup>1</sup>H NMR spectra of mono-6-deoxyl-6-ethylenediamino- $\beta$ -CD (400 MHz, D<sub>2</sub>O, TMS):  $\delta$ =5.07 (s, 7 H, H of C-1 of  $\beta$ -CD), 3.55-3.98 (m, 40 H, H of C-3, C-5, C-6, C-2, C-4 of  $\beta$ -CD), 2.86-3.04 (m, 4 H, -NH-CH<sub>2</sub>CH<sub>2</sub>-NH-); (b) <sup>13</sup>C NMR spectra of mono-6-deoxyl-6-ethylenediamino- $\beta$ -CD (101 MHz, DMSO):  $\delta$ =102.13, 83.45, 81.75, 74.80, 73.63, 72.90, 72.23, 70.52, 60.12, 49.93, 49.20, 24.70 ppm

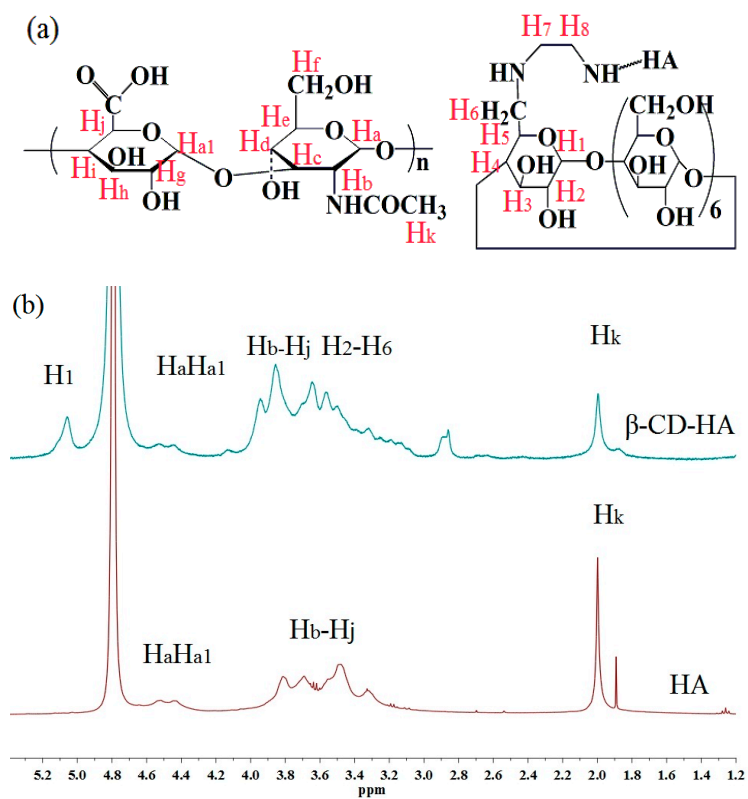

**Fig. S2.**  $^1\text{H}$  NMR spectra of CD-HA (600 MHz,  $\text{D}_2\text{O}$ , ppm):  $\delta=1.99$  (s, 3 H, H of  $\text{CH}_3$  group of HA), 3.02-3.94(m, 16.44 H, H of HA and C-3, C-5, C-6, C-2, C-4 and methylene on ethane diamine group of  $\beta$ -CD), 4.47-4.52(m, 2 H, H of HA), 5.02-5.06 (m, 2.25 H, H of C-1  $\beta$ -CD).

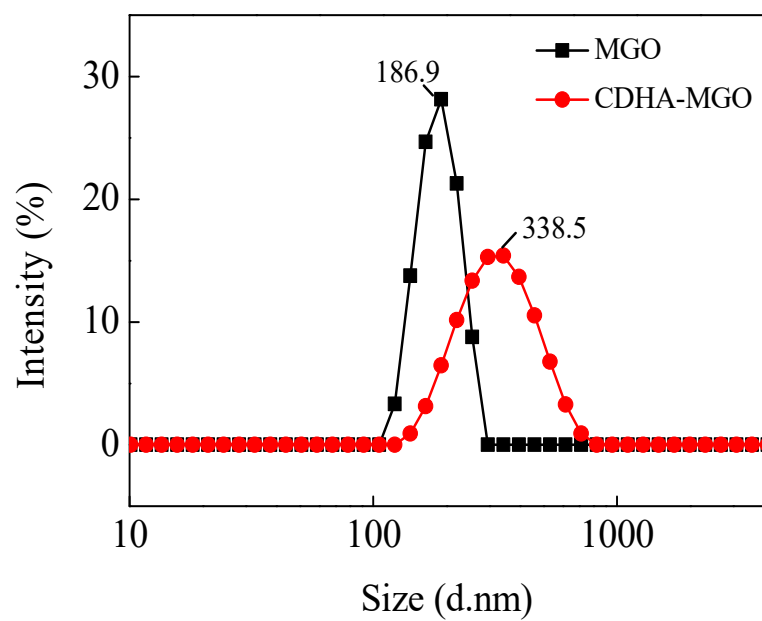

**Fig.S3.** Hydrodynamic diameter distributions of MGO and CDHA-MGO.

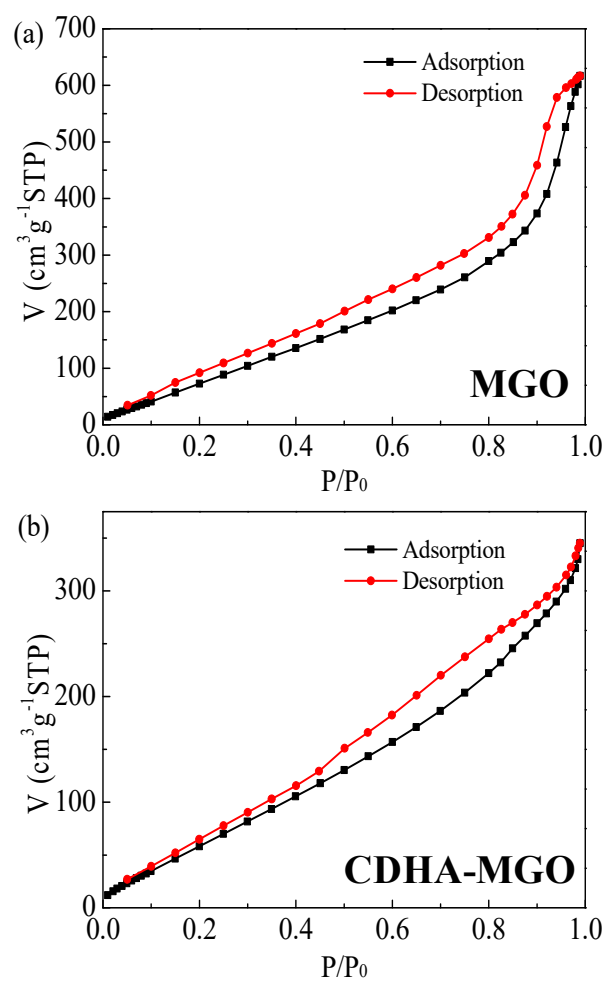

**Fig. S4.** N<sub>2</sub> adsorption-desorption isotherm curve of MGO (a) and CDHA-MGO (b).

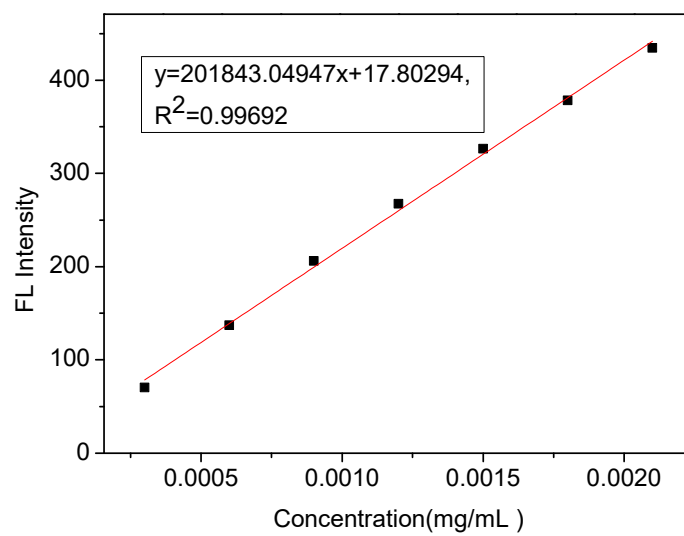

**Fig. S5.** Plot of calibration curves for DOX solution with different concentration.

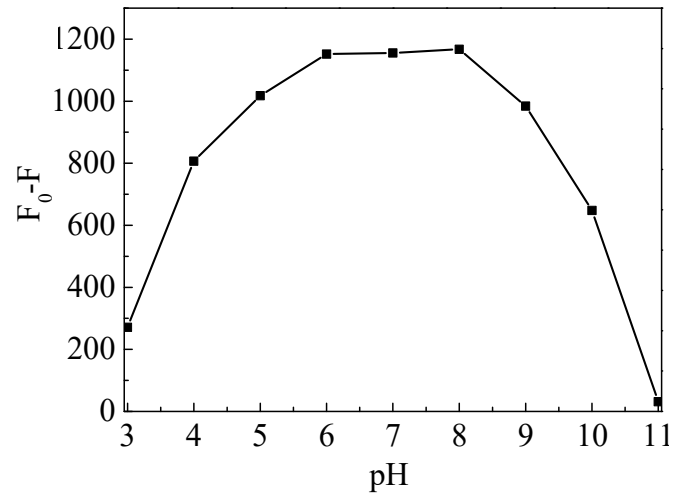

**Fig. S6.** Influence of pH on the adsorption of DOX onto CDHA-MGO.

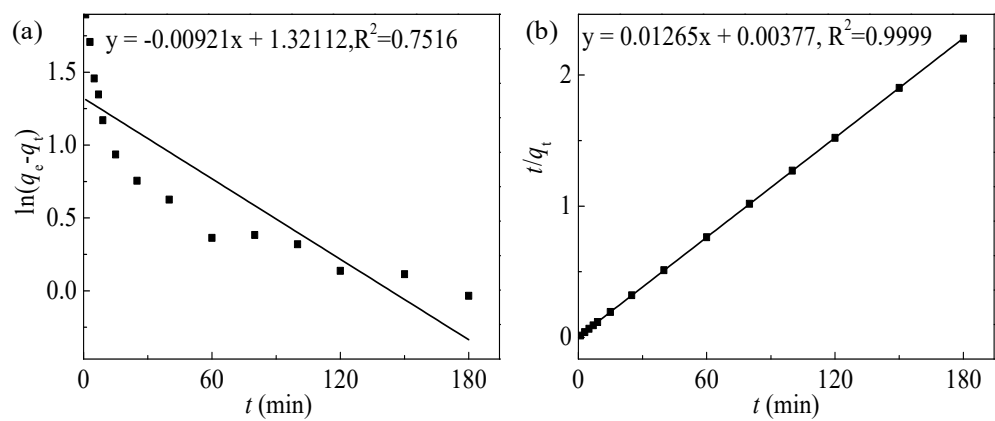

**Fig. S7.** The linear fitting plots of Lagergren's pseudo-first-order (a) and Ho's pseudo-second-order (b) equations.



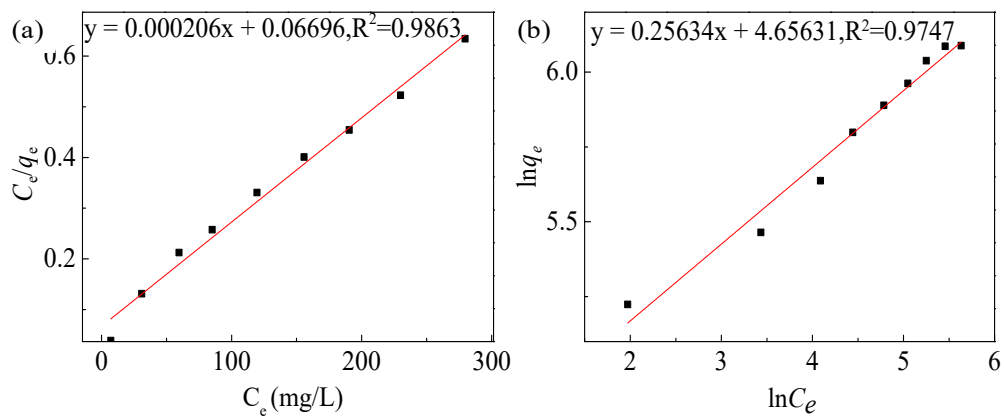

**Fig. S8.** Langmuir plot illustrating the linear dependences of  $1/Q_e$  on  $1/C_e$  (a), and Freundlich plot illustrating the linear dependences of  $\ln Q_e$  on  $\ln C_e$  (b) for adsorption of DOX.
